# Supplementary material for: Zika virus disrupts molecular fingerprinting of human neurospheres
Source: PubMed Central journal article supplement (PMC5256095; doi:10.1038/srep40780), 2017-01-23
Supplement: srep40780-s1.pdf [file srep40780-s1.pdf]

## Supplementary information

### **Zika virus disrupts molecular fingerprinting of human neurospheres**

Patricia P. Garcez<sup>2,1@</sup>, Juliana Minardi Nascimento<sup>1,3</sup>, Janaina Mota de Vasconcelos<sup>4</sup>, Rodrigo Madeiro da Costa<sup>1</sup>, Rodrigo Delvecchio<sup>5</sup>, Pablo Trindade<sup>1</sup>, Erick Correia Loiola<sup>1</sup>, Luiza M. Higa<sup>5</sup>, Juliana S. Cassoli<sup>3</sup>, Gabriela Vitória<sup>1</sup>, Patricia Sequeira<sup>6</sup>, Jaroslaw Sochacki<sup>1</sup>, Renato S. Aguiar<sup>5</sup>, Hellen Thais Fuzii<sup>7</sup>, Ana M. Bispo de Filippis<sup>6</sup>, João Lídio da Silva Gonçalves Vianez Júnior<sup>4</sup>, Amilcar Tanuri<sup>5</sup>, Daniel Martins-de-Souza<sup>3@</sup>, Stevens K. Rehen<sup>1, 2@</sup>

@Corresponding authors: srehen@lance.ufrj.org, ppgarcez@icb.ufrj.br, and dmsouza@unicamp.br

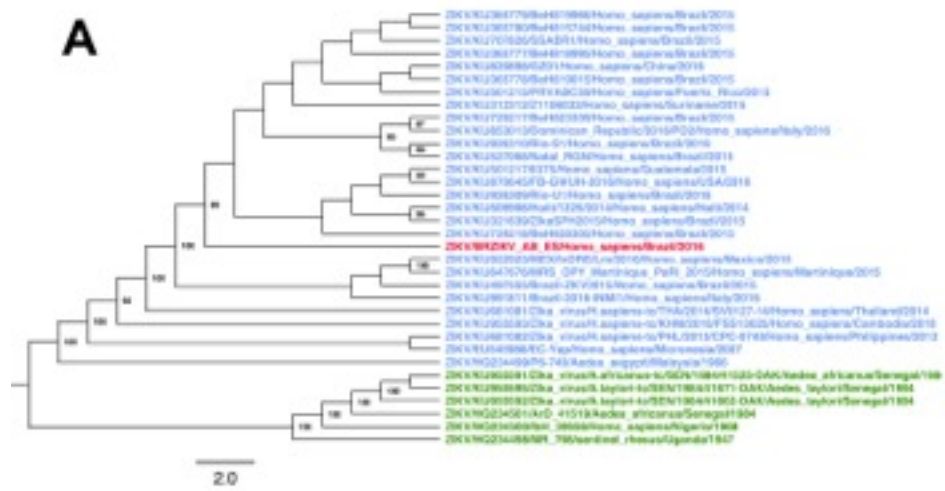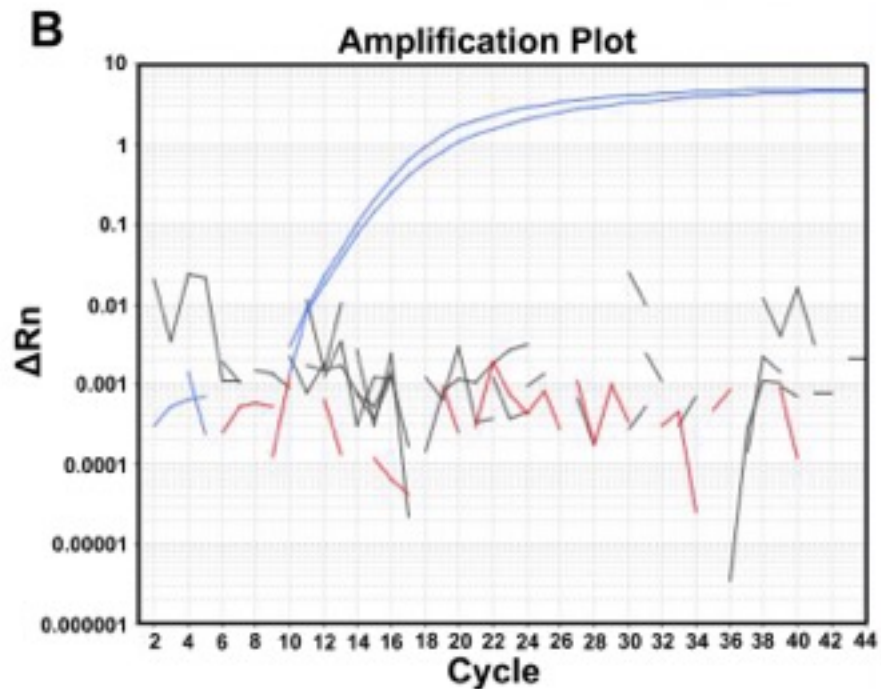

**Supplementary Figure S1: Asian genotype of ZIKV isolated in Brazil**

(A) Phylogenetic analysis including BRZIKV\_AB\_ES isolate and ZIKV available sequences. Both genotypes are represented on this ML (*maximum likelihood*) tree: in blue, Asian, in green, African genotype and, highlighted in red, the partial ZIKV sequence obtained from infected neurospheres here described (BRZIKV\_AB\_ES). The bootstrap values higher than 85% are shown. This analysis demonstrates that the isolated Brazilian ZIKV strain belongs to Asian genotype.

(B) ZIKV stock sample was analyzed by RT-PCR to detect Zika (blue lines), chikungunya (red line) and Dengue (black line) viruses.

1. HQ234498/MR\_766/Uganda/African  
2. EU545988/EC-Yap/Micronesia/Asian  
3. KX212103/AB0025/Brazil

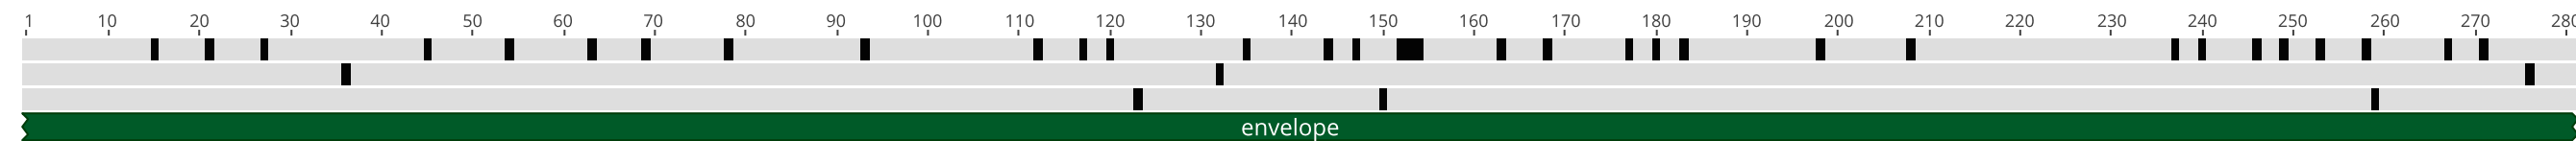

1. HQ234498/MR\_766/Uganda/African  
2. EU545988/EC-Yap/Micronesia/Asian  
3. KX212103/AB0025/Brazil

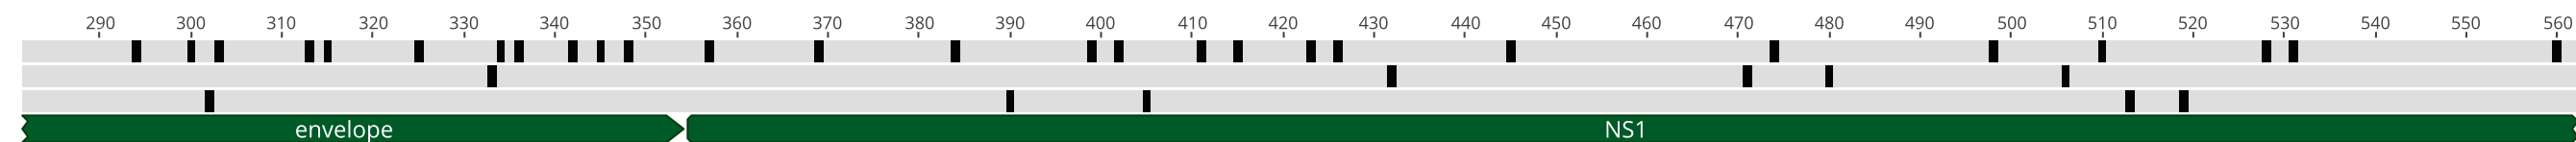

1. HQ234498/MR\_766/Uganda/African  
2. EU545988/EC-Yap/Micronesia/Asian  
3. KX212103/AB0025/Brazil

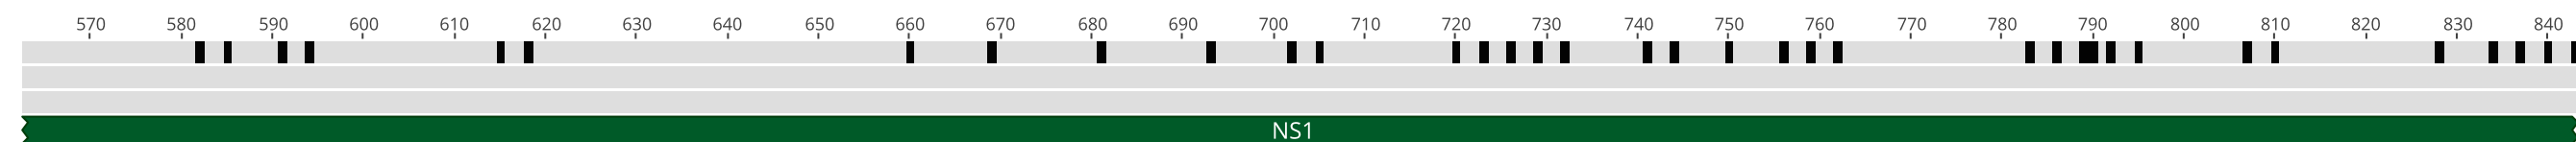

1. HQ234498/MR\_766/Uganda/African  
2. EU545988/EC-Yap/Micronesia/Asian  
3. KX212103/AB0025/Brazil

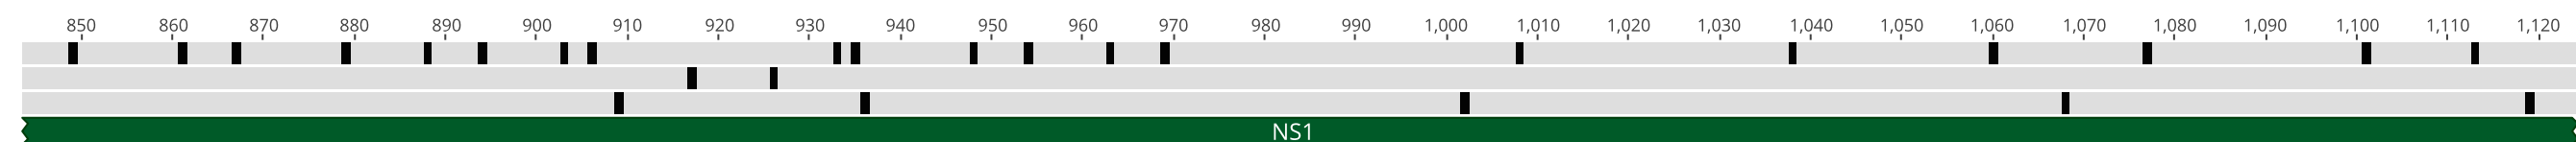

1. HQ234498/MR\_766/Uganda/African  
2. EU545988/EC-Yap/Micronesia/Asian  
3. KX212103/AB0025/Brazil

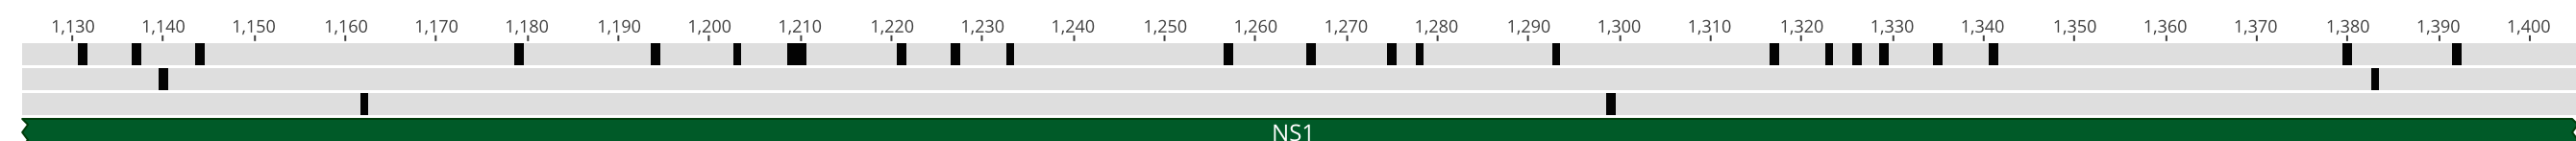

1. HQ234498/MR\_766/Uganda/African  
2. EU545988/EC-Yap/Micronesia/Asian  
3. KX212103/AB0025/Brazil

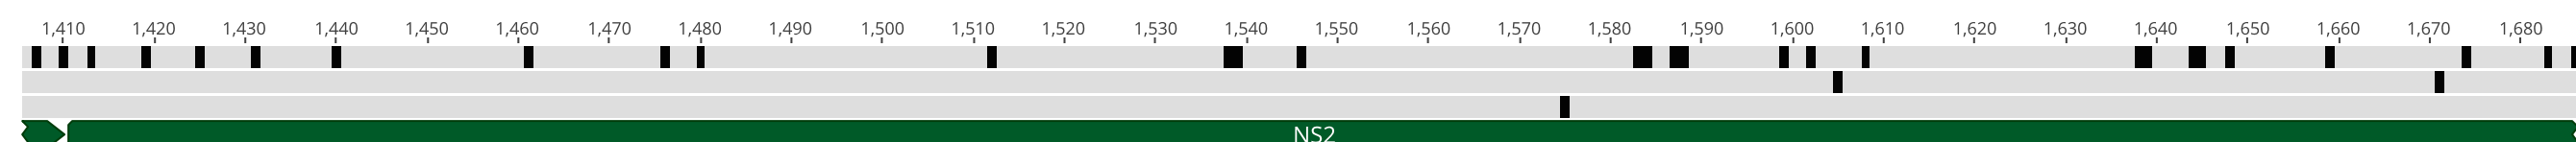

1. HQ234498/MR\_766/Uganda/African  
2. EU545988/EC-Yap/Micronesia/Asian  
3. KX212103/AB0025/Brazil

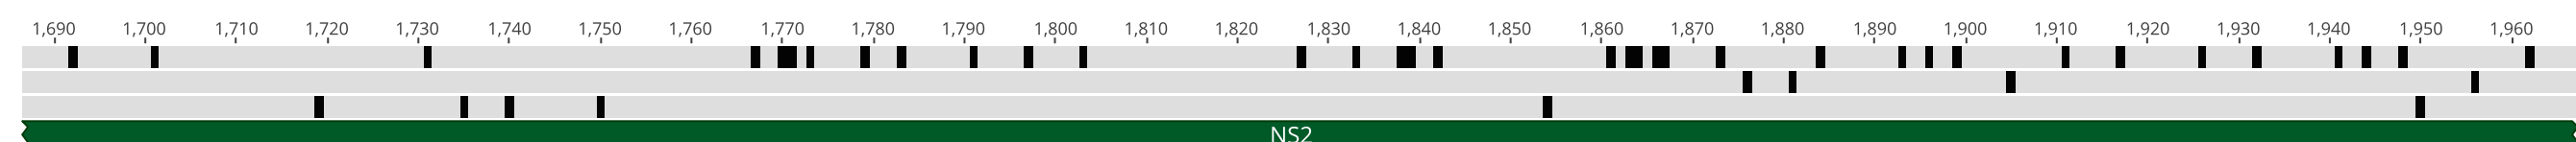

1. HQ234498/MR\_766/Uganda/African  
2. EU545988/EC-Yap/Micronesia/Asian  
3. KX212103/AB0025/Brazil

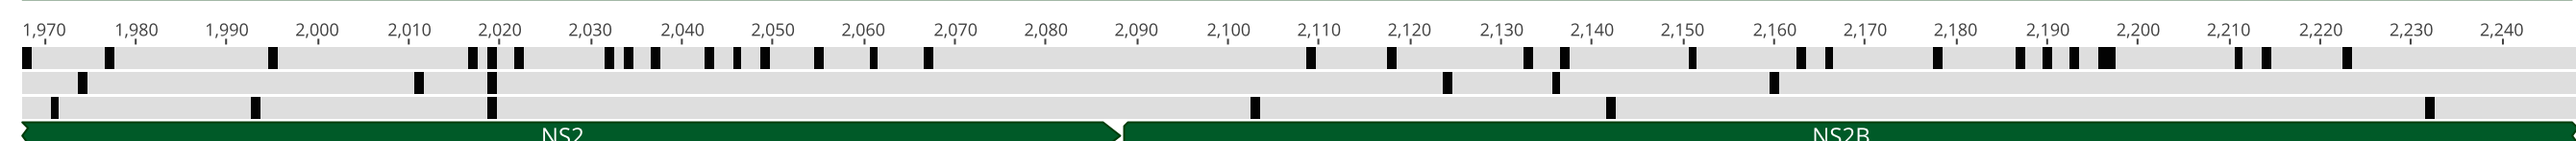

1. HQ234498/MR\_766/Uganda/African  
2. EU545988/EC-Yap/Micronesia/Asian  
3. KX212103/AB0025/Brazil

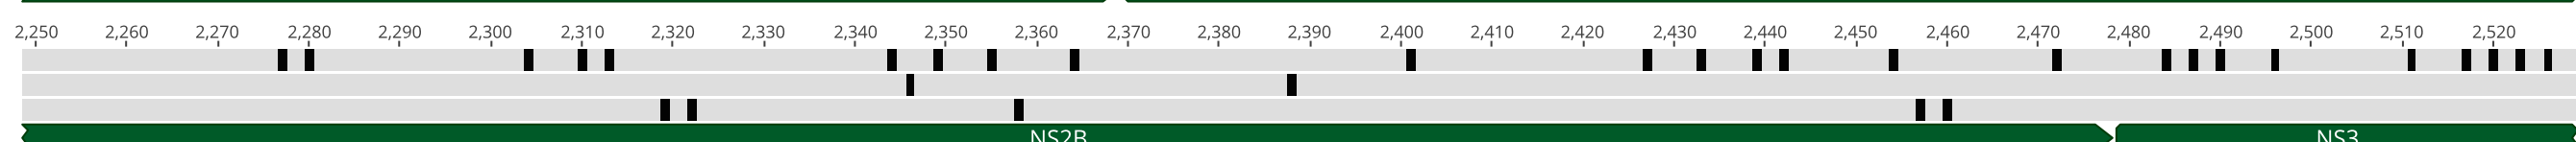

1. HQ234498/MR\_766/Uganda/African  
2. EU545988/EC-Yap/Micronesia/Asian  
3. KX212103/AB0025/Brazil

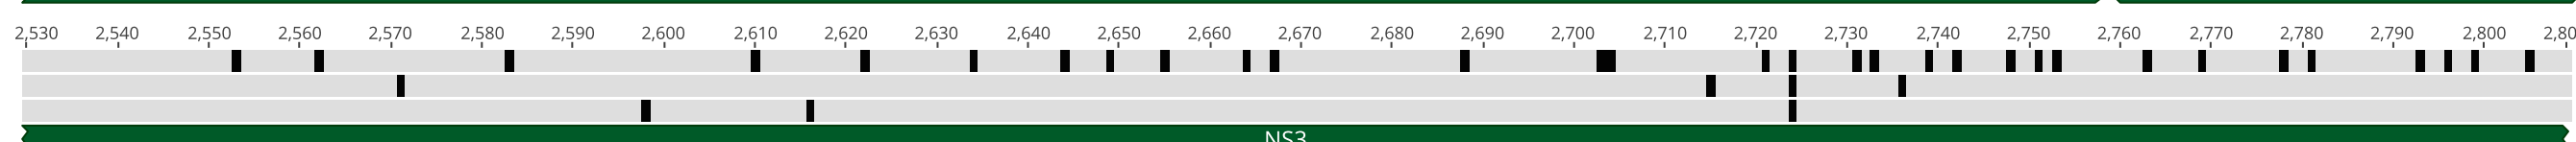

**Supplementary Figure S2: Genome map showing the conservation among the genes from an African (HQ234498), Asian (EU545988) strains and BRZIKV\_AB\_ES (KX212103).**

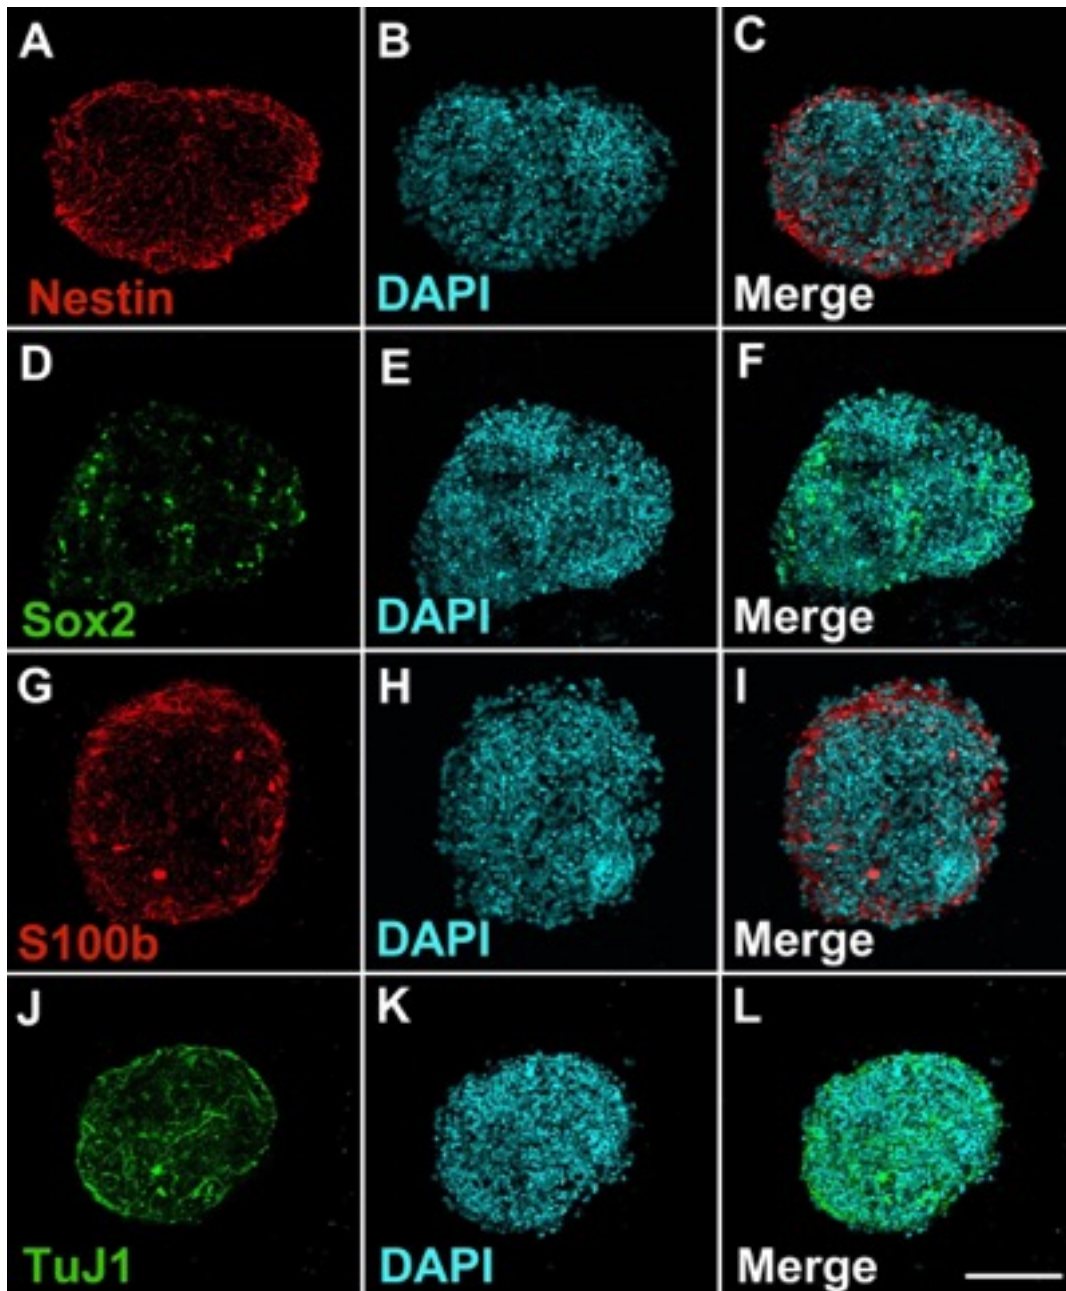

Supplementary Figure S3: After 3 days *in vitro* neurospheres express neural progenitor (Nestin, Sox2, S100b) and neuronal markers (TuJ1). Calibration Bar: 100 $\mu$ m

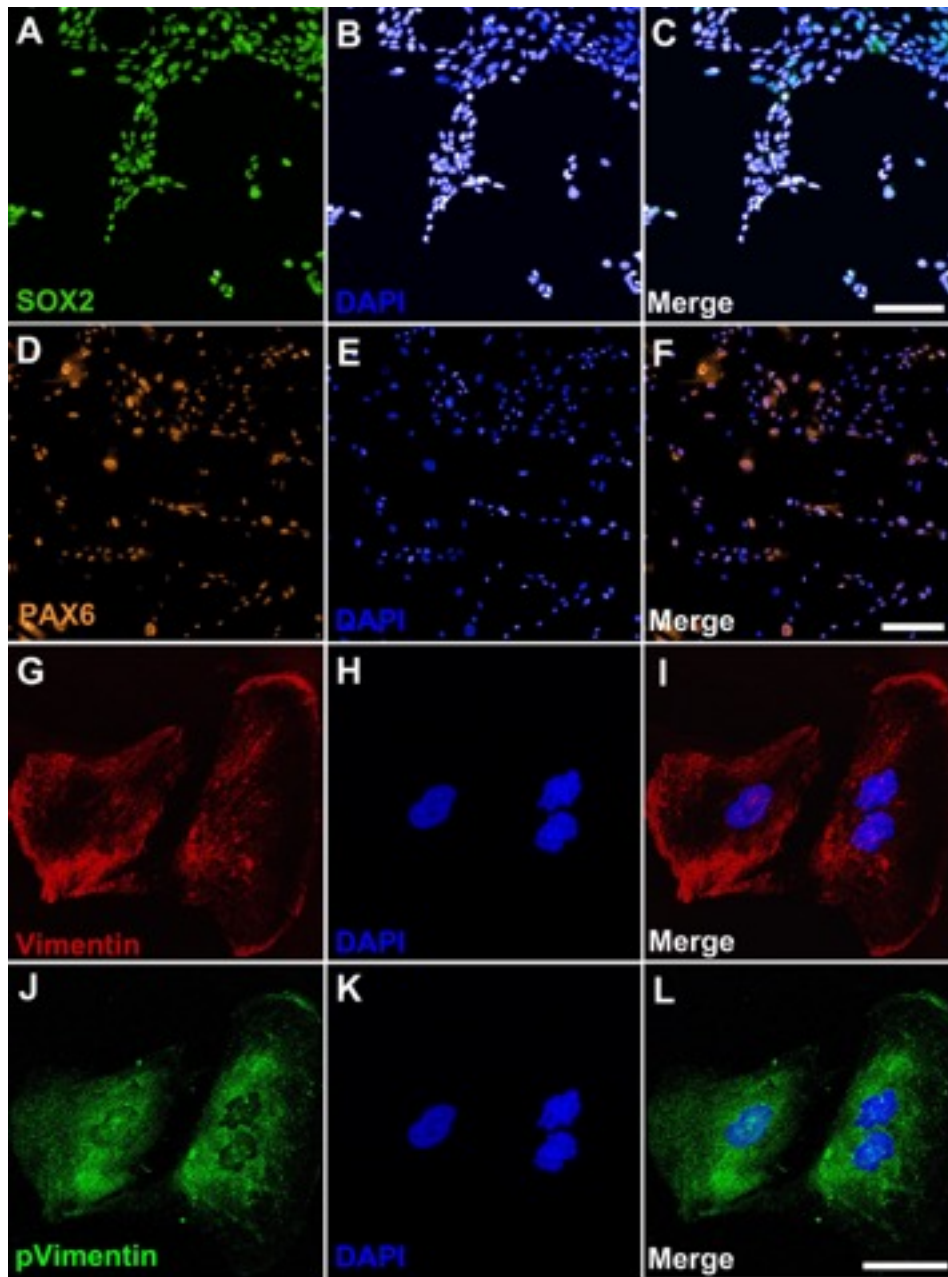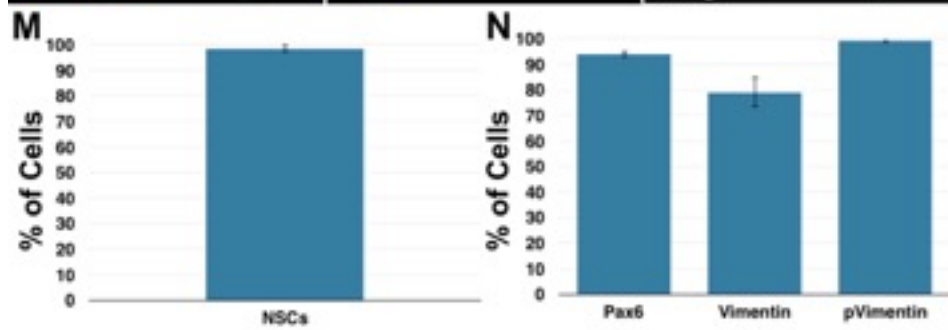

**Supplementary Figure S4. Immunocytochemistry for neural progenitor markers on human iPSCs-derived neural stem cells (NSCs) and radial glia-like cells (RGCs).** (A-C), virtually all NSCs were found positive for Sox2. Calibration bar on C = 100  $\mu\text{m}$ . (D-F) Pax6 labeling was found in the majority of RGCs. Calibration bar on F = 200  $\mu\text{m}$ . **G-I**, Vimentin labeling was found more abundantly on extremities of RGCs. (J-L) phosphorylated Vimentin (pVimentin) was found widespread in the cell body of all RGCs. Calibration bar on L (referred to G-L) = 50  $\mu\text{m}$ . (M) quantification of number of NSCs positive for Sox2. (N) quantification of number of RGCs positive for Pax6, Vimentin and pVimentin.



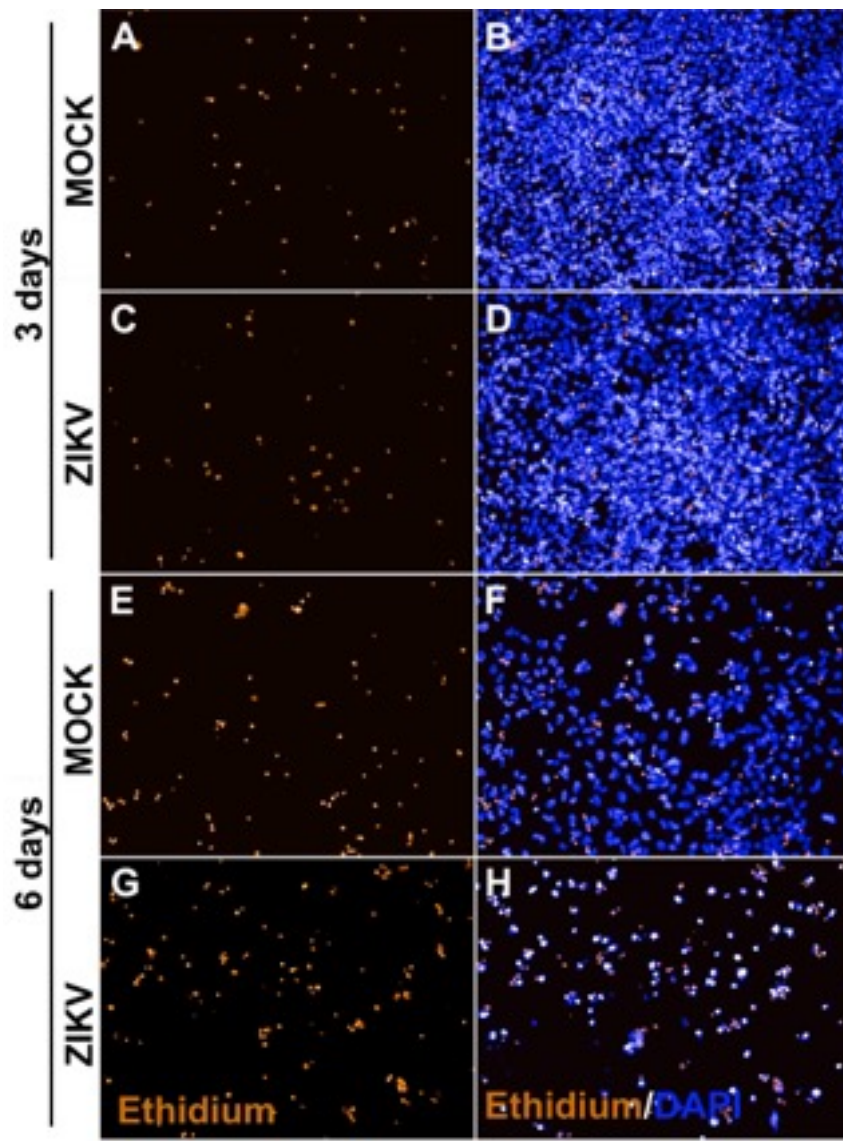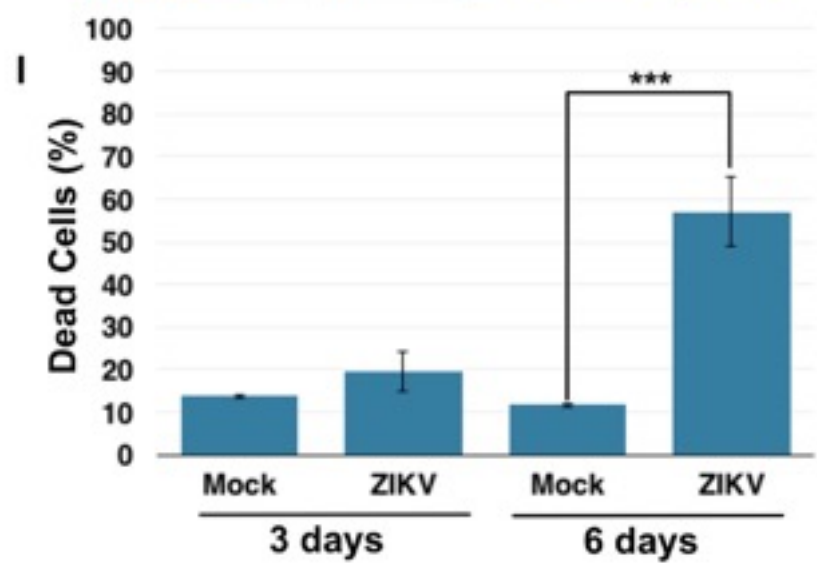



**Supplementary Figure S5. Ethidium incorporation labeling following ZIKV infection on NSCs.** (A-B), ethidium incorporation on mock-infected cells after 3 days of infection. (C-D) ZIKV-infected NSCs do not show strong ethidium incorporation following 3 days of infection. (E-F) ethidium incorporation on mock-infected cells after 6 days. (G-H) Many ZIKV-infected NSCs died following 6 days of infection and detached from the plate. Most of the cells that left were found labeled with ethidium. (I) quantification of dead cells by ethidium incorporation. \*\*\* $p < 0.001$ .

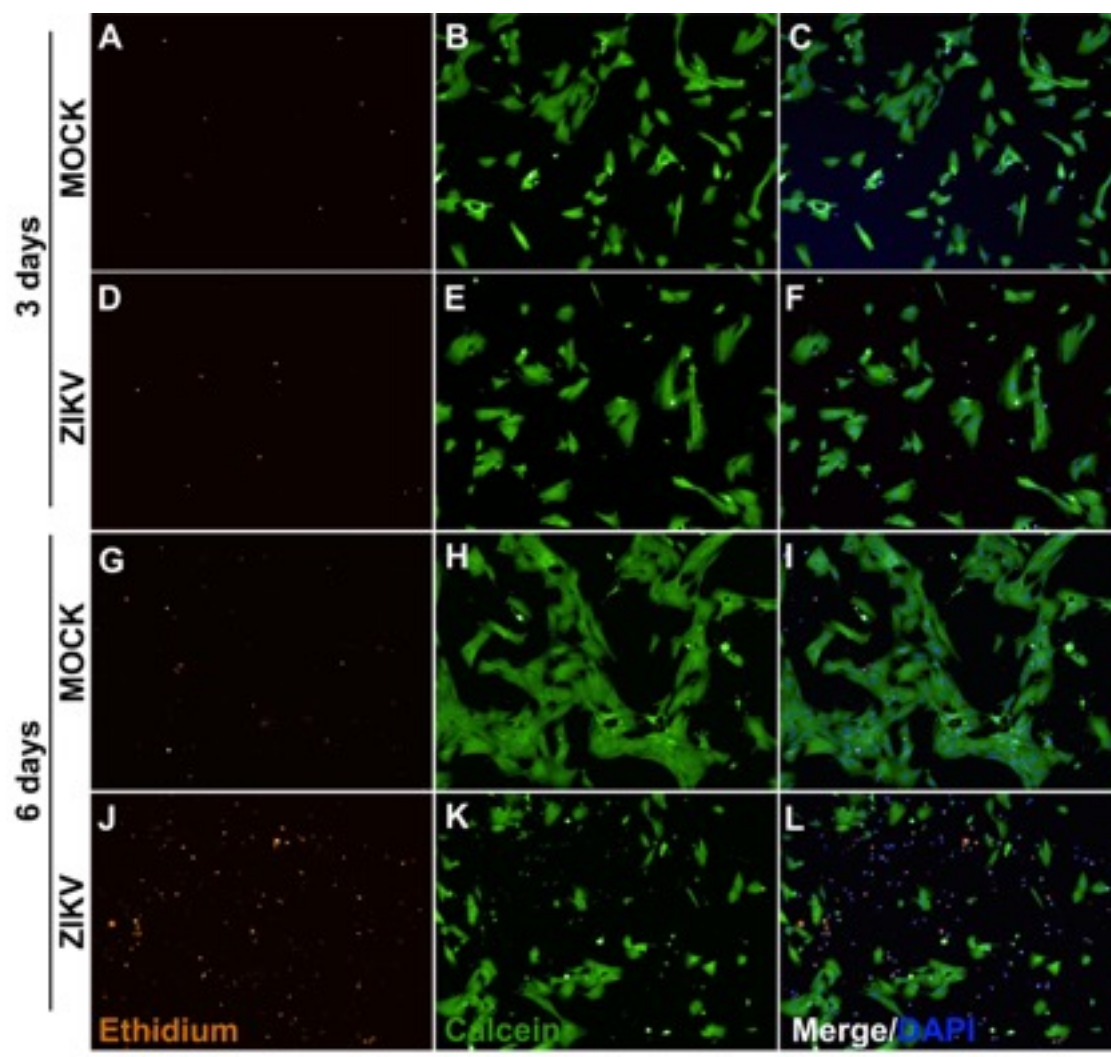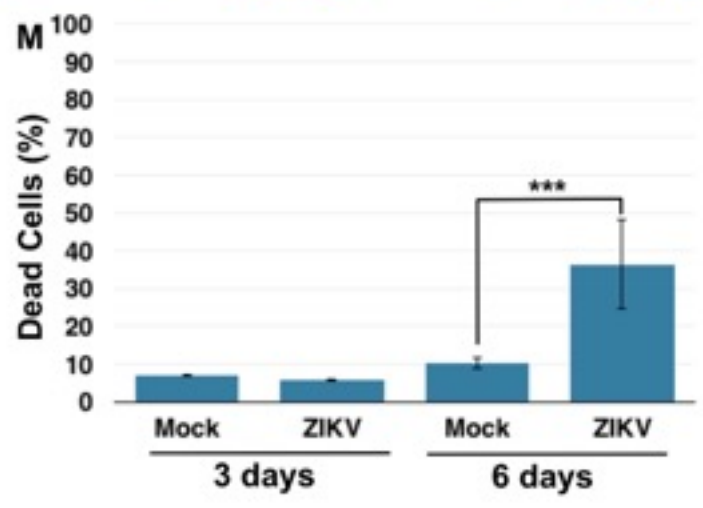

**Supplementary Figure S6. Ethidium and calcein incorporation labeling following ZIKV infection on RGCs.** (A-C) ethidium and calcein incorporation on mock-infected cells after 3 days of infection. D-F, ZIKV infection do not affect ethidium incorporation following 3 days of infection on RGCs. (G-I) ethidium and calcein incorporation on mock-infected RGCs after 6 days. (J-L) Many ZIKV-infected RGCs died following 6 days of infection or exhibited a shorter cell body area. (M) quantification of dead cells by ethidium incorporation. \*\*\* $p < 0.001$ .

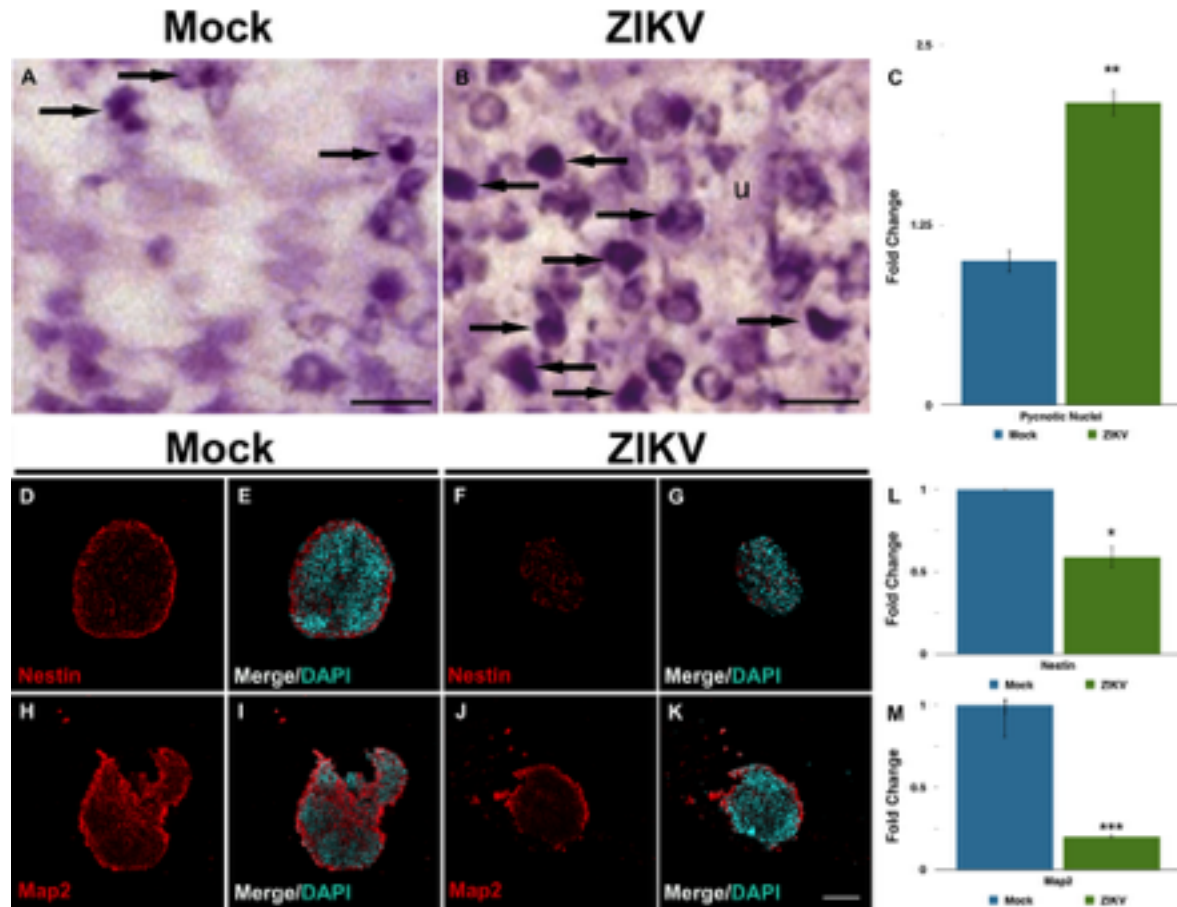

**Supplementary Figure S7: ZIKV infection increases the number of cells displaying pyknosis and decreases progenitors and neuronal markers on neurospheres**

(A-B) Brightfield photomicrographs of cells displaying condensed pyknotic (arrows) and fragmented nuclei (arrowheads). Calibration Bar: 10µm. (C) Quantification of the percentage of pyknotic nuclei found on Mock- and ZIKV- infected neurospheres. Data presented as mean ± SEM, n=4, Student’s t-test, \*\* p<0.01. Immunocytochemistry for the progenitor marker nestin (red) on mock- (D-E) and on ZIKV-infected neurospheres (F-G) counterstained with DAPI (blue). (H) Quantification of neural progenitor marker nestin fluorescence intensity. Immunocytochemistry for the neuronal marker MAP2 (red) on mock- (I-J) and ZIKV-infected neurospheres

(K-L) counterstained with DAPI (blue). (M) Quantification of neuronal marker MAP2 fluorescence intensity. Data presented as mean  $\pm$  SD, n=4, Student's t-test, \*p < 0.05. ; \*\*\* p<0.001 Calibration Bar: 100 $\mu$ m

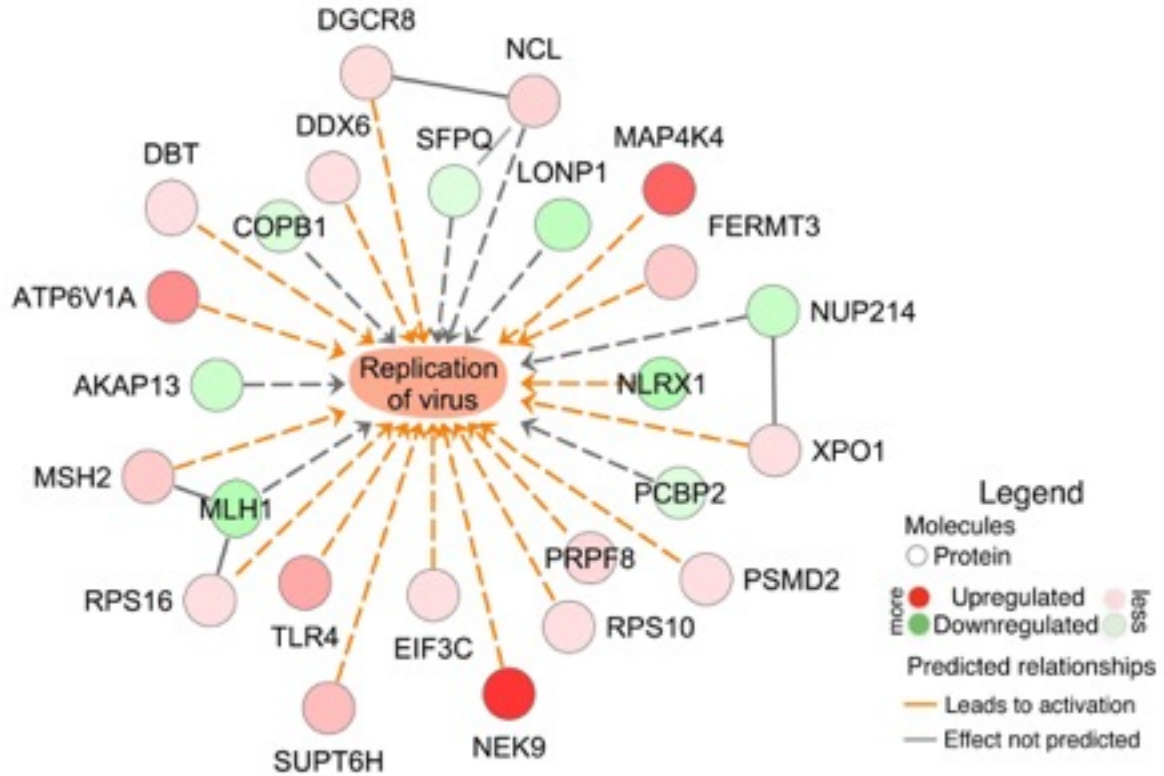

**Supplementary Figure S8: ZIKV infection upregulates proteins required for viral replication.** Network interactive representation of molecular relationship between regulated molecules on ZIKV-infected neurospheres. Interactome analyzed from the dataset based on Ingenuity Knowledge Database ([www.ingenuity.com](http://www.ingenuity.com)) and String ([string-db.org](http://string-db.org)).



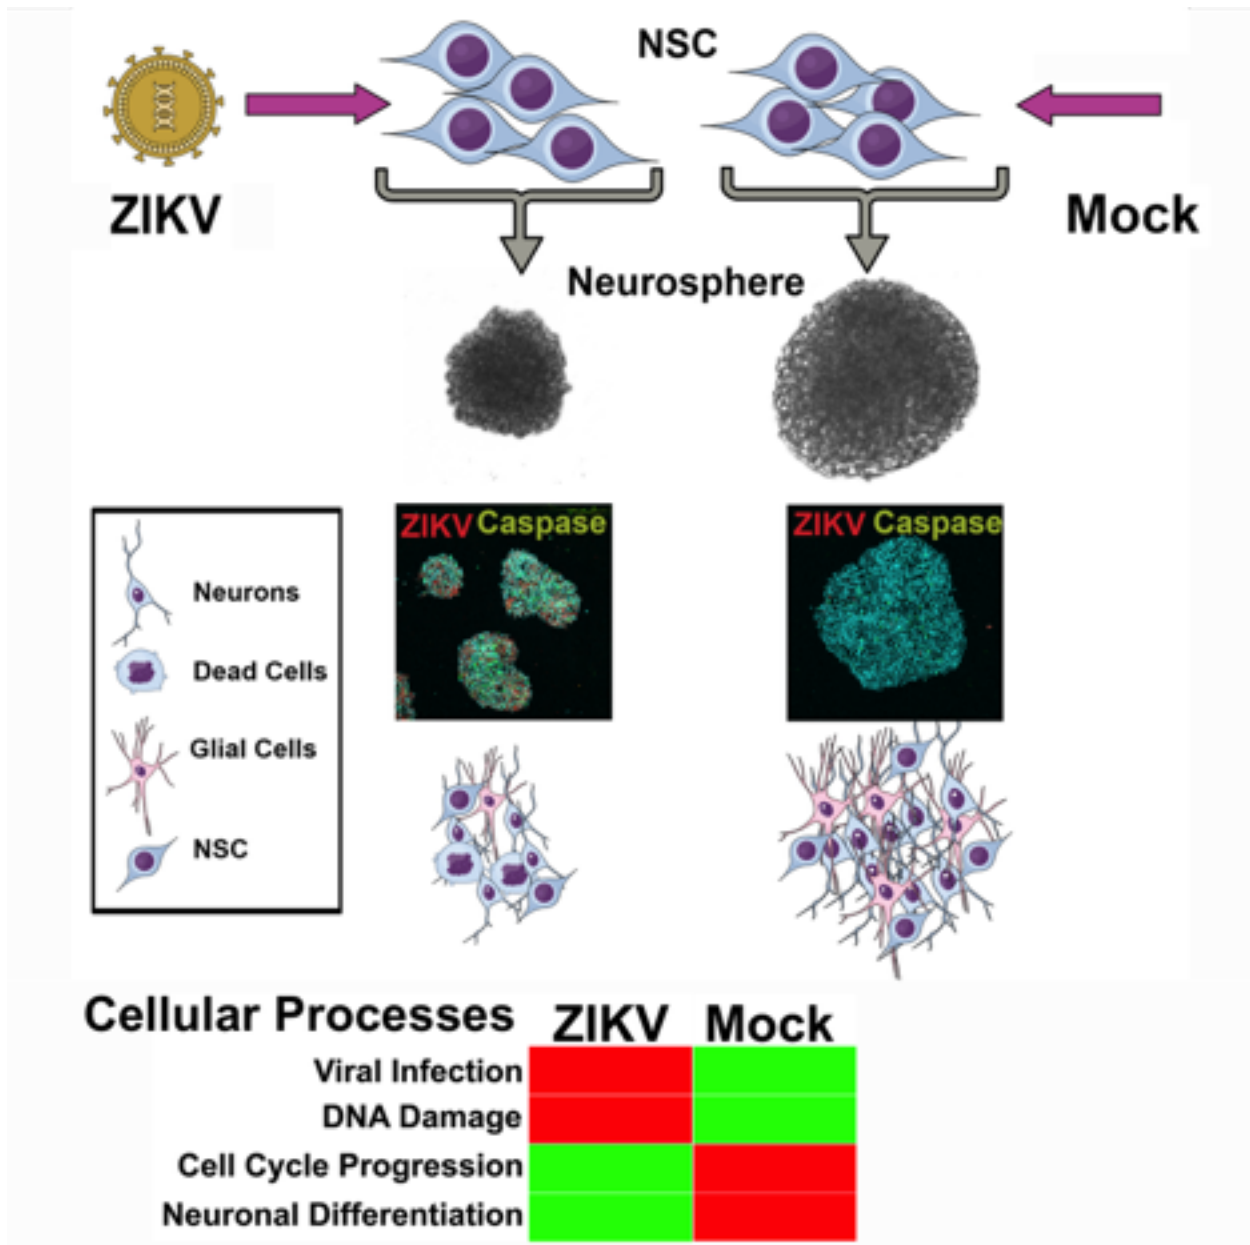

**Supplementary Figure S9: Summary of the molecular fingerprint of human neural cells infected by the ZIKV variant circulating in Brazil.** Figure created in the Mind the Graph platform, ([www.mindthegraph.com](http://www.mindthegraph.com)). Licensed under the Attribution-ShareAlike 4.0 International license. The license terms can be found on the following link: <https://creativecommons.org/licenses/by-sa/4.0/>.

**Supplementary Table S1:**

**Genetic analysis of evolutionary divergence between ZIKV isolated sequences. The nucleotide base per site was compared between sequences with the software Geneious v 9 (www.geneious.com).**

**Supplementary Table S2:**

**Differential protein expression between ZIKV- and mock-infected human neurospheres.**

**Supplementary Table S3:**

**Differential gene expression between ZIKV- and mock-infected human neurospheres.**
